# Supplementary material for: Necked strawberries are especially susceptible to cracking
Source: PeerJ. 2023 May 11;11:e15402. doi: 10.7717/peerj.15402 (PMC10183169; doi:10.7717/peerj.15402)
Supplement: Supplemental Information 1 [file peerj-11-15402-s001.xlsx]

## Sheet: Fig 2
# rep	Cultivar	mass (g)	max width (mm)	Max Length (mm)	Length:Width (ratio)	seedless zone length (mm)	seedless zone length (% of total length)	fruit shape: normal =0, neck =1
1	Dream	5.65932	21.6248	27.0056	1.24882	4.29592	15.9075	0
2	Dream	10.0229	27.7756	33.796	1.21675	5.16043	15.2693	0
3	Dream	7.00282	24.1511	27.99	1.15895	4.31	15.3984	0
4	Dream	7.36046	24.0431	28.067	1.16736	2.52022	8.97928	0
5	Dream	21.4834	35.1578	43.9951	1.25136	6.23734	14.1773	0
6	Dream	11.0483	29.1515	33.0143	1.13251	5.07631	15.3761	0
7	Dream	9.14496	28.1715	30.81	1.09366	4.79	15.5469	0
8	Dream	4.76914	18.4654	20.8448	1.12885	3.32475	15.9501	0
9	Dream	14.4832	30.0264	33.9874	1.13192	4.1907	12.3302	0
10	Dream	14.4832	30.0264	33.9874	1.13192	4.1907	12.3302	0
11	Dream	14.7998	30.3419	36.1001	1.18978	4.03727	11.1835	0
12	Dream	13.651	31.8958	33.1193	1.03836	4.68925	14.1587	0
13	Dream	17.3721	32.282	37.9334	1.17506	4.89072	12.8929	0
14	Dream	22.2632	33.4517	37.3201	1.11564	5.8467	15.6664	0
15	Dream	22.8151	36.6848	42.2786	1.15248	4.9252	11.6494	0
16	Dream	24.9308	35.9213	41.74	1.16199	5.63	13.4883	0
17	Dream	28.0107	40.8005	43.44	1.06469	7.04899	16.227	0
18	Dream	26.9141	38.6926	46.9797	1.21418	4.001	8.51644	0
19	Dream	26.9141	36.7578	42.5778	1.15833	5.23624	12.2981	0
20	Dream	26.9141	36.7578	42.5778	1.15833	5.23624	12.2981	0
21	Dream	26.1726	38.1388	44.6022	1.16947	6.71252	15.0497	0
22	Dream	23.0643	35.2712	40.596	1.15097	6.53537	16.0986	0
23	Dream	22.7523	29.7179	38.5482	1.29714	4.08609	10.6	0
24	Dream	19.4998	33.3677	38.6696	1.15889	3.90976	10.1107	0
25	Dream	18.1956	34.921	38.5848	1.10492	4.27634	11.083	0
26	Dream	14.715	30.7571	37.049	1.20457	5.99	16.1678	0
27	Dream	16.4384	32.2538	37.8248	1.17272	5.74843	15.1975	0
28	Dream	10.2163	22.2267	29.3039	1.31841	3.9799	13.5815	0
29	Dream	11.9068	27.6359	35.8108	1.29581	4.37822	12.226	0
30	Dream	14.5025	30.571	37.298	1.22004	5.06922	13.5911	0
31	Dream	16.6381	31.8298	39.6639	1.24612	5.89545	14.8635	0
32	Dream	11.3603	26.4163	34.7686	1.31618	5.12218	14.7322	0
33	Dream	15.6363	31.4667	32.881	1.04495	5.11548	15.5575	0
34	Dream	15.6363	30.8462	36.0014	1.16713	2.77108	7.69715	0
35	Dream	16.2188	27.8154	38.2229	1.37416	5.88246	15.3899	0
36	Dream	31.1561	29.6089	34.9416	1.1801	3.82828	10.9562	0
37	Dream	17.0831	30.6388	39.5276	1.29011	5.33745	13.5031	0
38	Dream	14.0338	30.5034	37.4341	1.22721	4.38909	11.7248	0
39	Joly	15.1198	38.2	40.02	1.04764	5.54	13.8431	0
40	Joly	16.1096	28.92	32.1	1.10996	4.44	13.8318	0
41	Joly	14.4768	37.3	41.69	1.11769	3.65	8.7551	0
42	Joly	18.6726	41.83	45.89	1.09706	4.08	8.89083	0
43	Joly	9.71715	31.45	40.03	1.27281	5.37	13.4149	0
44	Joly	13.3742	36.46	37.05	1.01618	4.18	11.2821	0
45	Joly	14.8573	33.3	37.54	1.12733	5.94	15.8231	0
46	Joly	15.9134	36.11	41.05	1.1368	2.41	5.87089	0
47	Joly	16.4384	37.36	46.64	1.24839	2.57	5.51029	0
48	Joly	14.715	35.12	38.43	1.09425	5.04	13.1148	0
49	Joly	17.9665	32.26	33.57	1.04061	3.01	8.96634	0
50	Joly	16.9571	35.84	37.33	1.04157	1.91	5.11653	0
51	Joly	14.3301	34.33	41.09	1.19691	4.52	11.0002	0
52	Joly	13.4881	38.75	42.7	1.10194	2.15	5.03513	0
53	Joly	16.3864	37.54	41.94	1.11721	2.39	5.69862	0
54	Joly	19.0892	41.77	45.85	1.09768	7.15	15.5943	0
55	Joly	15.9905	35.88	38.15	1.06327	3.06	8.02097	0
56	Joly	18.9023	34.02	37.92	1.11464	4.06	10.7068	0
57	Joly	15.9098	35.52	39.18	1.10304	2.72	6.94232	0
58	Joly	27.1311	42.6584	37.8225	0.886637	4.81211	12.7229	0
59	Joly	8.47748	22.6017	24.81	1.0977	3.57	14.3894	0
60	Joly	11.2145	21.9394	24.23	1.10441	3.6	14.8576	0
61	Joly	39.1024	31.8375	50.0111	1.57082	2.85838	5.7155	0
62	Joly	18.2429	24.2279	28.45	1.17426	4.66795	16.4075	0
63	Joly	19.4727	37.0064	41.8184	1.13003	5.71837	13.6743	0
64	Joly	32.3458	44.7995	48.4859	1.08229	6.28261	12.9576	0
65	Joly	35.0608	46.5336	61.7905	1.32787	8.41841	13.6241	0
66	Dream	28.0752	37.6392	51.2179	1.36076	11.4851	22.424	1
67	Dream	18.495	32.1984	41.25	1.28112	7.3	17.697	1
68	Dream	20.7814	34.4572	34.7978	1.00988	5.8922	16.9327	1
69	Dream	7.00282	21.4793	26.7676	1.2462	4.65407	17.3869	1
70	Dream	6.55179	23.6031	28.8099	1.2206	6.7479	23.4222	1
71	Dream	4.94025	16.7871	26.2056	1.56105	6.69709	25.556	1
72	Dream	12.0718	30.956	35.7696	1.1555	8.80586	24.6183	1
73	Dream	5.59094	23.0444	23.7733	1.03163	8.21603	34.56	1
74	Dream	3.56518	19.9915	20.0877	1.00481	9.74034	48.4892	1
75	Dream	3.56518	16.7231	19.4399	1.16246	7.07651	36.402	1
76	Dream	12.5295	27.5323	33.04	1.20004	5.88	17.7966	1
77	Dream	20.6902	33.8092	42.8796	1.26828	9.11868	21.2658	1
78	Dream	16.4305	30.5885	46.1126	1.50751	8.22712	17.8414	1
79	Dream	16.4305	30.5885	46.1126	1.50751	8.22712	17.8414	1
80	Dream	19.8424	29.8372	42.79	1.43412	7.61	17.7845	1
81	Dream	14.7998	30.0929	41.0486	1.36406	9.49165	23.1229	1
82	Dream	21.0044	31.7047	39.4329	1.24376	9.88469	25.0671	1
83	Dream	18.0276	30.5874	39.0655	1.27718	7.51156	19.2281	1
84	Dream	16.411	31.8418	38.241	1.20097	11.254	29.4291	1
85	Dream	25.7344	37.6307	41.8291	1.11157	8.23403	19.6849	1
86	Dream	23.0134	34.3972	43.2083	1.25616	10.889	25.2011	1
87	Dream	20.5978	33.9153	39.14	1.15405	7.4	18.9065	1
88	Dream	22.0898	34.0441	41.06	1.20608	6.99	17.0239	1
89	Dream	26.1726	37.0897	44.2626	1.19339	7.49002	16.9218	1
90	Dream	29.7669	39.435	48.38	1.22683	8.98	18.5614	1
91	Dream	27.7256	38.228	40.8188	1.06777	7.53036	18.4482	1
92	Dream	25.1905	38.0889	42.8052	1.12382	7.26666	16.9761	1
93	Dream	15.1198	27.3143	32.4726	1.18885	5.66154	17.4349	1
94	Dream	17.3615	31.86	38.5891	1.21121	6.46	16.7405	1
95	Dream	12.7697	29.5506	35.2805	1.1939	5.78	16.383	1
96	Dream	13.2158	22.966	34.0107	1.48091	6.125	18.0091	1
97	Dream	15.1733	25.879	27.2599	1.05336	7.16392	26.2801	1
98	Dream	17.8242	30.3579	33.6027	1.10689	6.44	19.1651	1
99	Dream	17.9335	25.0022	38.3543	1.53404	8.14891	21.2464	1
100	Dream	18.1757	28.4239	31.6231	1.11255	6.80789	21.5282	1
101	Dream	21.5874	30.8682	36.5175	1.18301	8.19495	22.4412	1
102	Dream	14.5025	29.1185	37.9275	1.30252	6.21687	16.3915	1
103	Dream	13.9109	29.7667	39.5032	1.32709	9.20879	23.3115	1
104	Dream	13.5847	29.2733	38.2962	1.30823	7.84701	20.4903	1
105	Dream	18.1489	33.5305	38.9012	1.16017	8.56072	22.0063	1
106	Dream	13.3286	31.5531	38.4767	1.21943	7.74121	20.1192	1
107	Dream	16.2188	29.6089	36.6302	1.23713	10.82	29.5385	1
108	Dream	16.2188	31.346	34.9416	1.11471	7.48	21.4072	1
109	Dream	14.005	29.6936	34.9416	1.17674	9.52458	27.2586	1
110	Dream	15.4021	27.1883	34.0325	1.25174	10.7098	31.4694	1
111	Dream	15.4021	29.3912	34.5209	1.17453	7.66821	22.2132	1
112	Dream	12.7895	38.1761	45.4044	1.18934	10.6741	23.5089	1
113	Dream	11.9234	32.3824	26.1121	0.806369	7.45029	28.5319	1
114	Dream	17.6935	34.4848	40.969	1.18803	8.0905	19.7478	1
115	Dream	17.6935	30.2679	41.9781	1.38689	7.18243	17.1099	1
116	Dream	22.7085	33.8833	46.0296	1.35848	7.45061	16.1866	1
117	Dream	22.7085	35.6825	46.0115	1.28947	8.18613	17.7915	1
118	Dream	18.5932	31.7356	45.1699	1.42332	8.98326	19.8877	1
119	Dream	13.0648	28.8164	35.717	1.23947	9.29665	26.0287	1
120	Dream	13.0648	27.8848	35.1593	1.26087	11.0504	31.4295	1
121	Dream	21.0917	35.6825	44.7583	1.25435	8.47382	18.9324	1
122	Dream	16.2825	33.0068	40.0422	1.21315	10.3721	25.9029	1
123	Dream	16.2825	30.7356	40.427	1.31531	9.59998	23.7465	1
124	Dream	17.4344	35.6825	39.89	1.11791	9.25	23.1888	1
125	Dream	17.9132	27.2969	43.9869	1.61142	8.31763	18.9093	1
126	Dream	12.2093	28.1075	35.0237	1.24606	9.67341	27.6196	1
127	Dream	13.3653	30.1252	35.7398	1.18638	5.94686	16.6393	1
128	Dream	19.6777	36.6967	37.2589	1.01532	8.22039	22.0629	1
129	Joly	20.9007	33.9398	35.0007	1.03126	6.16193	17.6052	1
130	Joly	16.0439	32.9887	37.4183	1.13428	6.03	16.1151	1
131	Joly	18.1956	36.71	38.5	1.04876	6.32	16.4156	1
132	Joly	9.00007	24.6189	40.584	1.64849	8.6626	21.3449	1
133	Joly	18.424	36.149	44.1246	1.22063	7.30895	16.5643	1
134	Joly	18.3278	35.0923	45.8834	1.30751	9.57299	20.8637	1
135	Joly	23.8423	32.5946	48.9451	1.50163	8.40233	17.1668	1
136	Joly	17.0376	34.0834	41.7905	1.22613	6.64	15.8888	1
137	Joly	37.0717	39.988	56.71	1.41818	9.88	17.422	1
138	Joly	39.2334	42.3082	60.1308	1.42126	10.3572	17.2244	1
139	Joly	39.2334	42.3082	60.1308	1.42126	10.3572	17.2244	1
140	Joly	36.1751	42.1551	51.5552	1.22299	11.976	23.2295	1
141	Joly	29.355	36.8273	51.2733	1.39226	11.659	22.7389	1
142	Joly	19.0719	35.8566	40.112	1.11868	6.81	16.9775	1
143	Joly	26.2945	38.9999	43.1348	1.10602	7.83061	18.1538	1
144	Joly	16.2126	33.3115	40.7963	1.22469	7.84626	19.2328	1
145	Joly	9.06321	22.4437	24.1949	1.07803	3.95267	16.3368	1
146	Joly	35.5636	38.9281	51.7647	1.32975	9.92415	19.1716	1
147	Joly	39.1024	31.2512	45.3	1.44954	7.65	16.8874	1
148	Joly	21.3073	40.0358	42.2368	1.05497	11.29	26.7302	1
149	Joly	23.5251	33.4533	41.32	1.23515	7.86	19.0223	1
150	Joly	21.4952	34.1325	38.31	1.12239	7.55	19.7076	1
151	Joly	7.64753	24.7897	28.4273	1.14674	6.93491	24.3952	1
152	Joly	29.4253	35.1782	45.0125	1.27956	8.03066	17.841	1
153	Joly	29.4253	36.7854	36.1512	0.982758	8.99165	24.8724	1
154	Joly	29.4253	35.86	34.93	0.974066	7.85	22.4735	1
155	Joly	18.6932	33.4244	40.1976	1.20264	6.99565	17.4032	1
156	Joly	18.6932	34.004	41.0101	1.20604	6.72857	16.4071	1
157	Joly	18.1726	35.0712	35.99	1.0262	9.35	25.9794	1
158	Joly	9.83049	22.4658	35.9841	1.60172	9.85098	27.3759	1
159	Joly	43.1113	42.0928	57.4	1.36365	9.22	16.0627	1
160	Joly	29.5283	36.98	48.2755	1.30545	9.07513	18.7986	1
161	Joly	6.63956	25.2527	35.1676	1.39262	7.54467	21.4535	1
162	Joly	8.21448	24.4145	32.9474	1.3495	7.08992	21.5189	1
163	Joly	8.21448	25.3613	34.1801	1.34772	8.55466	25.0282	1
164	Joly	7.96873	42.2117	45.7972	1.08494	9.20166	20.0922	1
165	Joly	7.96873	34.4038	43.45	1.26294	7.14	16.4327	1
166	Joly	9.65779	27.355	41.7972	1.52796	7.8136	18.6941	1
167	Joly	9.65779	28.4167	41.9945	1.47781	7.77132	18.5056	1
168	Joly	13.6672	37.9647	35.8642	0.944671	6.98047	19.4636	1
169	Joly	4.35219	23.4886	28.1078	1.19666	5.72631	20.3726	1
170	Joly	10.6697	31.8381	37.2401	1.16967	7.72325	20.7391	1
171	Joly	39.4546	28.3988	39.8711	1.40397	8.2657	20.731	1
172	Joly	12.0672	39.2024	35.5965	0.90802	7.00693	19.6843	1
173	Joly	33.2391	29.002	33.5551	1.15699	6.34233	18.9012	1
174	Joly	11.3914	38.2555	40.3616	1.05505	6.74767	16.718	1
175	Joly	15.3354	28.8166	30.1725	1.04705	5.39677	17.8864	1
176	Joly	40.4653	39.311	50.5022	1.28468	8.63403	17.0964	1
177	Joly	36.7634	26.3639	39.7639	1.50827	8.06458	20.2812	1
178	Joly	17.6508	27.9102	30.0315	1.076	8.18186	27.2442	1
179	Joly	6.76394	21.8506	28.2868	1.29455	6.05704	21.4129	1
180	Joly	39.6961	43.6394	45.1611	1.03487	8.03225	17.7858	1
181	Joly	40.4653	44.0399	45.3795	1.03042	8.26315	18.209	1
182	Joly	12.4549	27.2934	42.5304	1.55826	9.83207	23.1177	1
183	Joly	9.79624	24.8576	38.1209	1.53357	10.2293	26.8339	1
184	Joly	11.5212	27.9626	39.1165	1.39889	10.7897	27.5834	1
185	Joly	18.0003	25.2887	38.0341	1.504	9.66566	25.4131	1
186	Joly	40.496	35.474	46.7115	1.31678	9.42408	20.1751	1
187	Joly	16.655	31.9236	47.4742	1.48712	9.65	20.3268	1
188	Joly	13.3336	27.975	42.8142	1.53045	7.17	16.7468	1
189	Joly	11.0589	27.9588	42.9318	1.53554	11.0442	25.725	1
190	Joly	23.5307	35.0958	46.2695	1.31837	7.96212	17.2081	1
191	Joly	13.5862	27.8505	44.5548	1.59978	10.438	23.4273	1
192	Joly	18.465	33.026	41.4801	1.25598	8.1	19.5274	1
193	Joly	33.1853	44.7265	50.629	1.13197	9.62405	19.009	1

## Sheet: Fig 3
	Mid and distal
	bin	mean	Count	Frequency(%)
0	-100	-100	0	0
1	-80	-90	1	1.88679
2	-60	-70	0	0
3	-40	-50	3	5.66038
4	-20	-30	3	5.66038
5	0	-10	17	32.0755
6	20	10	18	33.9623
7	40	30	9	16.9811
8	60	50	1	1.88679
9	80	70	1	1.88679
10	100	90	0	0
		total	53	100
	Proximal
	bin	mean	Count	Frequency(%)
0	-100	-100	0	0
1	-80	-90	43	43.4343
2	-60	-70	9	9.09091
3	-40	-50	0	0
4	-20	-30	1	1.0101
5	0	-10	0	0
6	20	10	1	1.0101
7	40	30	0	0
8	60	50	0	0
9	80	70	13	13.1313
10	100	90	32	32.3232
		total	99	100
	total
	bin	mean	Count	Frequency(%)
0	-100	-100	0	0
1	-80	-90	44	28.9474
2	-60	-70	9	5.92105
3	-40	-50	3	1.97368
4	-20	-30	4	2.63158
5	0	-10	17	11.1842
6	20	10	19	12.5
7	40	30	9	5.92105
8	60	50	1	0.657895
9	80	70	14	9.21053
10	100	90	32	21.0526
		total	152	100

## Sheet: Fig 5
	Normal						Neck
Proximal
Count	50	Max	12.54	Used Class width	20		Count	50	Max	9.95	Used Class width	20
Mean	-0.6886	Class width	3.62034				Mean	-1.8548	Class width	2.74189
Min.	-16.68	Smallest class	-100				Min.	-12.18	Smallest class	-100
	class no.	bin	mean	Count	Frequency(%)			class no.	bin	mean	Count	Frequency(%)
	0	-100	-100	0	0			0	-100	-100	0	0
	1	-80	-90	0	0			1	-80	-90	0	0
	2	-60	-70	0	0			2	-60	-70	0	0
	3	-40	-50	0	0			3	-40	-50	0	0
	4	-20	-30	0	0			4	-20	-30	0	0
	5	0	-10	22	44			5	0	-10	33	66
	6	20	10	28	56			6	20	10	17	34
	7	40	30	0	0			7	40	30	0	0
	8	60	50	0	0			8	60	50	0	0
	9	80	70	0	0			9	80	70	0	0
	10	100	90	0	0			10	100	90	0	0
			total	50	100					total	50	100
	Normal						Neck
Mid
Count	50	Max	15.58	Used Class width	20		Count	50	Max	0	Used Class width	20
Mean	-1.1232	Class width	3.56458				Mean	1.9096	Class width	2.56843
Min.	-13.19	Smallest class	-100				Min.	-20.73	Smallest class	-100
	class no.	bin	mean	Count	Frequency(%)			class no.	bin	mean	Count	Frequency(%)
	0	-100	-100	0	0			0	-100	-100	0	0
	1	-80	-90	0	0			1	-80	-90	0	0
	2	-60	-70	0	0			2	-60	-70	0	0
	3	-40	-50	0	0			3	-40	-50	0	0
	4	-20	-30	0	0			4	-20	-30	1	2
	5	0	-10	28	56			5	0	-10	16	32
	6	20	10	22	44			6	20	10	33	66
	7	40	30	0	0			7	40	30	0	0
	8	60	50	0	0			8	60	50	0	0
	9	80	70	0	0			9	80	70	0	0
	10	100	90	0	0			10	100	90	0	0
			total	50	100					total	50	100
	Normal						Neck
Distal
Count	50	Max	11.53	Used Class width	20		Count	50	Max	16.88	Used Class width	20
Mean	-0.144	Class width	2.7865				Mean	-0.099	Class width	4.28444
Min.	-10.96	Smallest class	-100				Min.	-17.7	Smallest class	-100
	class no.	bin	mean	Count	Frequency(%)			class no.	bin	mean	Count	Frequency(%)
	0	-100	-100	0	0			0	-100	-100	0	0
	1	-80	-90	0	0			1	-80	-90	0	0
	2	-60	-70	0	0			2	-60	-70	0	0
	3	-40	-50	0	0			3	-40	-50	0	0
	4	-20	-30	0	0			4	-20	-30	0	0
	5	0	-10	27	54			5	0	-10	21	42
	6	20	10	23	46			6	20	10	29	58
	7	40	30	0	0			7	40	30	0	0
	8	60	50	0	0			8	60	50	0	0
	9	80	70	0	0			9	80	70	0	0
	10	100	90	0	0			10	100	90	0	0
			total	50	100					total	50	100

## Sheet: Fig 6
	Neck fruit
Proximal
Count	40	Max	90	Used Class width	20
Mean	22.19	Class width	24.2417
Min.	-87.56	Smallest class	-100
	class no.	bin	mean	Count	Frequency(%)
	0	-100	-100	0	0
	1	-80	-90	2	5
	2	-60	-70	6	15
	3	-40	-50	2	5
	4	-20	-30	1	2.5
	5	0	-10	4	10
	6	20	10	2	5
	7	40	30	1	2.5
	8	60	50	3	7.5
	9	80	70	11	27.5
	10	100	90	8	20
			total	40	100
Mid
Count	40	Max	83.99	Used Class width	20
Mean	6.10975	Class width	23.1536
Min.	-85.6	Smallest class	-100
	class no.	bin	mean	Count	Frequency(%)
	0	-100	-100	0	0
	1	-80	-90	1	2.5
	2	-60	-70	2	5
	3	-40	-50	2	5
	4	-20	-30	4	10
	5	0	-10	8	20
	6	20	10	11	27.5
	7	40	30	4	10
	8	60	50	2	5
	9	80	70	4	10
	10	100	90	2	5
			total	40	100
Distal
Count	40	Max	72.26	Used Class width	20
Mean	-9.14475	Class width	22.0082
Min.	-88.94	Smallest class	-100
	class no.	bin	mean	Count	Frequency(%)
	0	-100	-100	0	0
	1	-80	-90	4	10
	2	-60	-70	2	5
	3	-40	-50	2	5
	4	-20	-30	3	7.5
	5	0	-10	10	25
	6	20	10	13	32.5
	7	40	30	3	7.5
	8	60	50	2	5
	9	80	70	1	2.5
	10	100	90	0	0
			total	40	100

## Sheet: Fig 7
	Longitudinal		Latitudinal
time (h)	W (mm)	SE	W (mm)	SE
0	0	0	0	0
0.0166667	0.345661	0.0146793	0.245392	0.0250826
4	0.511261	0.0311124	0.482759	0.0485183
8	0.562806	0.0367478	0.525317	0.0534336
24	0.585281	0.039893	0.539055	0.0529177
48	0.599209	0.0402356	0.553496	0.0555704
	Count				Frequency (%)
Time/Crack type	Longitudinal	Latitudinal	Longitudinal+Latitudinal	Total	Longitudinal	Latitudinal	Longitudinal+Latitudinal	Total
0	0	0	0	0	0	0	0	0
2	4	3	1	8	8	6	2	16
4	8	13	3	24	16	26	6	48
6	11	16	3	30	22	32	6	60
24	15	20	3	38	30	40	6	76

## Sheet: Table 1
cultivar	rep	row	size	Shape	Cracked	Sound	Total	p.cracked
dream	1	1	Small	Normal	0	5	5	0
dream	2	2	Small	Normal	2	1	3	0.666667
dream	3	3	Small	Normal	1	5	6	0.166667
dream	4	4	Small	Normal	2	3	5	0.4
dream	5	5	Small	Normal	2	3	5	0.4
dream	1	1	Small	Neck	2	3	5	0.4
dream	2	2	Small	Neck	7	0	7	1
dream	3	3	Small	Neck	3	1	4	0.75
dream	4	4	Small	Neck	4	1	5	0.8
dream	5	5	Small	Neck	5	0	5	1
dream	11	1	Medium	Normal	2	2	4	0.5
dream	12	2	Medium	Normal	0	0	0	0
dream	13	3	Medium	Normal	1	1	2	0.5
dream	14	4	Medium	Normal	1	0	1	1
dream	15	5	Medium	Normal	1	3	4	0.25
dream	11	1	Medium	Neck	6	0	6	1
dream	12	2	Medium	Neck	10	0	10	1
dream	13	3	Medium	Neck	5	3	8	0.625
dream	14	4	Medium	Neck	8	1	9	0.888889
dream	15	5	Medium	Neck	5	1	6	0.833333
dream	21	1	Large	Normal	2	0	2	1
dream	22	2	Large	Normal	1	0	1	1
dream	23	3	Large	Normal	3	1	4	0.75
dream	24	4	Large	Normal	2	0	2	1
dream	25	5	Large	Normal	0	1	1	0
dream	21	1	Large	Neck	8	0	8	1
dream	22	2	Large	Neck	8	1	9	0.888889
dream	23	3	Large	Neck	6	0	6	1
dream	24	4	Large	Neck	8	0	8	1
dream	25	5	Large	Neck	8	1	9	0.888889
joly	1	1	Small	Normal	0	0	0	0
joly	2	2	Small	Normal	0	0	0	0
joly	3	3	Small	Normal	0	2	2	0
joly	4	4	Small	Normal	1	3	4	0.25
joly	5	5	Small	Normal	1	2	3	0.333333
joly	1	1	Small	Neck	6	4	10	0.6
joly	2	2	Small	Neck	7	3	10	0.7
joly	3	3	Small	Neck	6	2	8	0.75
joly	4	4	Small	Neck	5	1	6	0.833333
joly	5	5	Small	Neck	4	3	7	0.571429
joly	11	1	Medium	Normal	0	0	0	0
joly	12	2	Medium	Normal	0	0	0	0
joly	13	3	Medium	Normal	0	1	1	0
joly	14	4	Medium	Normal	0	1	1	0
joly	15	5	Medium	Normal	1	0	1	1
joly	11	1	Medium	Neck	10	0	10	1
joly	12	2	Medium	Neck	7	3	10	0.7
joly	13	3	Medium	Neck	6	3	9	0.666667
joly	14	4	Medium	Neck	6	3	9	0.666667
joly	15	5	Medium	Neck	6	3	9	0.666667
joly	21	1	Large	Normal	0	0	0	0
joly	22	2	Large	Normal	0	0	0	0
joly	23	3	Large	Normal	1	1	2	0.5
joly	24	4	Large	Normal	0	0	0	0
joly	25	5	Large	Normal	0	1	1	0
joly	21	1	Large	Neck	9	1	10	0.9
joly	22	2	Large	Neck	9	1	10	0.9
joly	23	3	Large	Neck	7	1	8	0.875
joly	24	4	Large	Neck	6	4	10	0.6
joly	25	5	Large	Neck	8	1	9	0.888889
flair	1	1	Small	Normal	0	3	3	0
flair	2	2	Small	Normal	0	6	6	0
flair	3	3	Small	Normal	0	2	2	0
flair	4	4	Small	Normal	0	5	5	0
flair	5	5	Small	Normal	2	6	8	0.25
flair	1	1	Small	Neck	3	4	7	0.428571
flair	2	2	Small	Neck	0	4	4	0
flair	3	3	Small	Neck	1	7	8	0.125
flair	4	4	Small	Neck	0	5	5	0
flair	5	5	Small	Neck	0	2	2	0
flair	11	1	Medium	Normal	1	6	7	0.142857
flair	12	2	Medium	Normal	1	6	7	0.142857
flair	13	3	Medium	Normal	1	6	7	0.142857
flair	14	4	Medium	Normal	3	4	7	0.428571
flair	15	5	Medium	Normal	2	6	8	0.25
flair	11	1	Medium	Neck	1	2	3	0.333333
flair	12	2	Medium	Neck	2	1	3	0.666667
flair	13	3	Medium	Neck	0	3	3	0
flair	14	4	Medium	Neck	2	1	3	0.666667
flair	15	5	Medium	Neck	1	1	2	0.5
flair	21	1	Large	Normal	3	0	3	1
flair	22	2	Large	Normal	2	3	5	0.4
flair	23	3	Large	Normal	2	6	8	0.25
flair	24	4	Large	Normal	2	3	5	0.4
flair	25	5	Large	Normal	1	4	5	0.2
flair	21	1	Large	Neck	7	0	7	1
flair	22	2	Large	Neck	0	5	5	0
flair	23	3	Large	Neck	2	0	2	1
flair	24	4	Large	Neck	2	3	5	0.4
flair	25	5	Large	Neck	4	1	5	0.8
lambada	1	1	Small	Normal	0	4	4	0
lambada	2	2	Small	Normal	1	3	4	0.25
lambada	3	3	Small	Normal	1	3	4	0.25
lambada	4	4	Small	Normal	0	2	2	0
lambada	5	5	Small	Normal	0	5	5	0
lambada	1	1	Small	Neck	0	6	6	0
lambada	2	2	Small	Neck	0	6	6	0
lambada	3	3	Small	Neck	2	4	6	0.333333
lambada	4	4	Small	Neck	1	7	8	0.125
lambada	5	5	Small	Neck	1	4	5	0.2
lambada	11	1	Medium	Normal	1	2	3	0.333333
lambada	12	2	Medium	Normal	0	5	5	0
lambada	13	3	Medium	Normal	1	4	5	0.2
lambada	14	4	Medium	Normal	0	3	3	0
lambada	15	5	Medium	Normal	0	5	5	0
lambada	11	1	Medium	Neck	3	4	7	0.428571
lambada	12	2	Medium	Neck	1	4	5	0.2
lambada	13	3	Medium	Neck	1	4	5	0.2
lambada	14	4	Medium	Neck	0	7	7	0
lambada	15	5	Medium	Neck	2	3	5	0.4
lambada	21	1	Large	Normal	0	1	1	0
lambada	22	2	Large	Normal	0	1	1	0
lambada	23	3	Large	Normal	0	4	4	0
lambada	24	4	Large	Normal	0	3	3	0
lambada	25	5	Large	Normal	1	2	3	0.333333
lambada	21	1	Large	Neck	4	5	9	0.444444
lambada	22	2	Large	Neck	3	6	9	0.333333
lambada	23	3	Large	Neck	4	2	6	0.666667
lambada	24	4	Large	Neck	3	4	7	0.428571
lambada	25	5	Large	Neck	4	3	7	0.571429

## Sheet: Table 2
type	position	cuticle mass (g/m2)
control	seedless	0.763944
control	seedless	1.3369
control	seedless	0.986761
control	seedless	0.859437
control	seedless	0.748028
control	seedless	0.843521
control	seedless	0.779859
control	seedless	0.795775
control	seedless	0.843521
control	seedless	0.81169
neck	seedless	0.843521
neck	seedless	0.652535
neck	seedless	0.763944
neck	seedless	0.986761
neck	seedless	0.684366
neck	seedless	0.986761
neck	seedless	0.939014
neck	seedless	1.05042
neck	seedless	0.795775
neck	seedless	1.05042
control	body	0.381972
control	body	0.445634
control	body	0.381972
control	body	0.445634
control	body	0.350141
control	body	0.397887
control	body	0.509296
control	body	0.397887
control	body	0.49338
control	body	0.413803
neck	body	0.557042
neck	body	0.525211
neck	body	0.525211
neck	body	0.63662
neck	body	0.509296
neck	body	0.541127
neck	body	0.668451
neck	body	0.477465
neck	body	0.509296
neck	body	0.509296

## Sheet: Table 3
# sample	Section of the fruit	Type	Length (um)	Width (um)	Aspect ratio
1	Proximal	normal	0.17	0.04	4.25
2	Proximal	normal	0.13	0.04	3.25
3	Proximal	normal	0.18	0.05	3.6
4	Proximal	normal	0.1	0.05	2
5	Proximal	normal	0.12	0.04	3
6	Proximal	normal	0.15	0.04	3.75
7	Proximal	normal	0.13	0.04	3.25
8	Proximal	normal	0.13	0.04	3.25
9	Proximal	normal	0.14	0.03	4.66667
10	Proximal	normal	0.12	0.04	3
11	Proximal	normal	0.11	0.06	1.83333
12	Proximal	normal	0.09	0.07	1.28571
13	Proximal	normal	0.12	0.08	1.5
14	Proximal	normal	0.2	0.06	3.33333
15	Proximal	normal	0.13	0.06	2.16667
16	Proximal	normal	0.16	0.05	3.2
17	Proximal	normal	0.08	0.05	1.6
18	Proximal	normal	0.14	0.05	2.8
19	Proximal	normal	0.13	0.06	2.16667
20	Proximal	normal	0.11	0.06	1.83333
21	Proximal	normal	0.18	0.04	4.5
22	Proximal	normal	0.17	0.05	3.4
23	Proximal	normal	0.17	0.04	4.25
24	Proximal	normal	0.12	0.05	2.4
25	Proximal	normal	0.15	0.04	3.75
26	Proximal	normal	0.25	0.06	4.16667
27	Proximal	normal	0.14	0.05	2.8
28	Proximal	normal	0.25	0.05	5
29	Proximal	normal	0.26	0.05	5.2
30	Proximal	normal	0.16	0.05	3.2
31	Proximal	normal	0.2	0.04	5
32	Proximal	normal	0.14	0.04	3.5
33	Proximal	normal	0.17	0.05	3.4
34	Proximal	normal	0.16	0.04	4
35	Proximal	normal	0.14	0.04	3.5
36	Proximal	normal	0.14	0.06	2.33333
37	Proximal	normal	0.15	0.07	2.14286
38	Proximal	normal	0.16	0.06	2.66667
39	Proximal	normal	0.2	0.05	4
40	Proximal	normal	0.13	0.05	2.6
41	Proximal	normal	0.2	0.05	4
42	Proximal	normal	0.18	0.05	3.6
43	Proximal	normal	0.19	0.05	3.8
44	Proximal	normal	0.2	0.04	5
45	Proximal	normal	0.14	0.04	3.5
46	Proximal	normal	0.16	0.04	4
47	Proximal	normal	0.14	0.04	3.5
48	Proximal	normal	0.16	0.05	3.2
49	Proximal	normal	0.11	0.05	2.2
50	Proximal	normal	0.12	0.04	3
1	Mid	normal	0.17	0.07	2.42857
2	Mid	normal	0.15	0.05	3
3	Mid	normal	0.15	0.06	2.5
4	Mid	normal	0.14	0.05	2.8
5	Mid	normal	0.11	0.05	2.2
6	Mid	normal	0.24	0.04	6
7	Mid	normal	0.16	0.04	4
8	Mid	normal	0.15	0.05	3
9	Mid	normal	0.19	0.07	2.71429
10	Mid	normal	0.17	0.05	3.4
11	Mid	normal	0.14	0.09	1.55556
12	Mid	normal	0.15	0.06	2.5
13	Mid	normal	0.09	0.06	1.5
14	Mid	normal	0.12	0.07	1.71429
15	Mid	normal	0.1	0.07	1.42857
16	Mid	normal	0.13	0.06	2.16667
17	Mid	normal	0.11	0.06	1.83333
18	Mid	normal	0.14	0.06	2.33333
19	Mid	normal	0.14	0.06	2.33333
20	Mid	normal	0.16	0.05	3.2
21	Mid	normal	0.12	0.06	2
22	Mid	normal	0.07	0.06	1.16667
23	Mid	normal	0.1	0.06	1.66667
24	Mid	normal	0.13	0.05	2.6
25	Mid	normal	0.18	0.06	3
26	Mid	normal	0.16	0.05	3.2
27	Mid	normal	0.12	0.05	2.4
28	Mid	normal	0.17	0.04	4.25
29	Mid	normal	0.12	0.05	2.4
30	Mid	normal	0.12	0.05	2.4
31	Mid	normal	0.15	0.06	2.5
32	Mid	normal	0.25	0.05	5
33	Mid	normal	0.19	0.06	3.16667
34	Mid	normal	0.16	0.05	3.2
35	Mid	normal	0.14	0.06	2.33333
36	Mid	normal	0.17	0.06	2.83333
37	Mid	normal	0.1	0.06	1.66667
38	Mid	normal	0.15	0.05	3
39	Mid	normal	0.16	0.05	3.2
40	Mid	normal	0.14	0.06	2.33333
41	Mid	normal	0.13	0.05	2.6
42	Mid	normal	0.14	0.05	2.8
43	Mid	normal	0.15	0.04	3.75
44	Mid	normal	0.15	0.04	3.75
45	Mid	normal	0.14	0.05	2.8
46	Mid	normal	0.16	0.06	2.66667
47	Mid	normal	0.13	0.05	2.6
48	Mid	normal	0.13	0.08	1.625
49	Mid	normal	0.19	0.06	3.16667
50	Mid	normal	0.09	0.08	1.125
1	Distal	normal	0.14	0.06	2.33333
2	Distal	normal	0.16	0.05	3.2
3	Distal	normal	0.12	0.06	2
4	Distal	normal	0.15	0.06	2.5
5	Distal	normal	0.14	0.05	2.8
6	Distal	normal	0.11	0.05	2.2
7	Distal	normal	0.09	0.08	1.125
8	Distal	normal	0.08	0.05	1.6
9	Distal	normal	0.09	0.07	1.28571
10	Distal	normal	0.09	0.08	1.125
11	Distal	normal	0.14	0.06	2.33333
12	Distal	normal	0.14	0.06	2.33333
13	Distal	normal	0.14	0.06	2.33333
14	Distal	normal	0.12	0.06	2
15	Distal	normal	0.11	0.06	1.83333
16	Distal	normal	0.12	0.08	1.5
17	Distal	normal	0.12	0.05	2.4
18	Distal	normal	0.12	0.04	3
19	Distal	normal	0.1	0.05	2
20	Distal	normal	0.08	0.07	1.14286
21	Distal	normal	0.11	0.07	1.57143
22	Distal	normal	0.07	0.06	1.16667
23	Distal	normal	0.1	0.06	1.66667
24	Distal	normal	0.1	0.06	1.66667
25	Distal	normal	0.11	0.05	2.2
26	Distal	normal	0.14	0.07	2
27	Distal	normal	0.12	0.07	1.71429
28	Distal	normal	0.11	0.04	2.75
29	Distal	normal	0.11	0.05	2.2
30	Distal	normal	0.12	0.04	3
31	Distal	normal	0.15	0.05	3
32	Distal	normal	0.17	0.05	3.4
33	Distal	normal	0.11	0.07	1.57143
34	Distal	normal	0.09	0.06	1.5
35	Distal	normal	0.11	0.05	2.2
36	Distal	normal	0.11	0.05	2.2
37	Distal	normal	0.1	0.06	1.66667
38	Distal	normal	0.08	0.07	1.14286
39	Distal	normal	0.1	0.04	2.5
40	Distal	normal	0.1	0.06	1.66667
41	Distal	normal	0.13	0.07	1.85714
42	Distal	normal	0.15	0.05	3
43	Distal	normal	0.13	0.06	2.16667
44	Distal	normal	0.09	0.07	1.28571
45	Distal	normal	0.1	0.07	1.42857
46	Distal	normal	0.15	0.05	3
47	Distal	normal	0.12	0.08	1.5
48	Distal	normal	0.12	0.08	1.5
49	Distal	normal	0.13	0.06	2.16667
50	Distal	normal	0.13	0.05	2.6
1	Proximal	neck	0.27	0.05	5.4
2	Proximal	neck	0.25	0.06	4.16667
3	Proximal	neck	0.19	0.06	3.16667
4	Proximal	neck	0.27	0.05	5.4
5	Proximal	neck	0.18	0.05	3.6
6	Proximal	neck	0.27	0.06	4.5
7	Proximal	neck	0.25	0.07	3.57143
8	Proximal	neck	0.29	0.07	4.14286
9	Proximal	neck	0.18	0.04	4.5
10	Proximal	neck	0.29	0.06	4.83333
11	Proximal	neck	0.23	0.04	5.75
12	Proximal	neck	0.15	0.03	5
13	Proximal	neck	0.33	0.04	8.25
14	Proximal	neck	0.24	0.04	6
15	Proximal	neck	0.25	0.06	4.16667
16	Proximal	neck	0.26	0.06	4.33333
17	Proximal	neck	0.29	0.04	7.25
18	Proximal	neck	0.18	0.05	3.6
19	Proximal	neck	0.2	0.04	5
20	Proximal	neck	0.19	0.06	3.16667
21	Proximal	neck	0.28	0.05	5.6
22	Proximal	neck	0.22	0.05	4.4
23	Proximal	neck	0.24	0.06	4
24	Proximal	neck	0.23	0.04	5.75
25	Proximal	neck	0.23	0.08	2.875
26	Proximal	neck	0.22	0.04	5.5
27	Proximal	neck	0.17	0.05	3.4
28	Proximal	neck	0.22	0.04	5.5
29	Proximal	neck	0.25	0.05	5
30	Proximal	neck	0.24	0.04	6
31	Proximal	neck	0.32	0.06	5.33333
32	Proximal	neck	0.25	0.05	5
33	Proximal	neck	0.23	0.07	3.28571
34	Proximal	neck	0.29	0.05	5.8
35	Proximal	neck	0.18	0.06	3
36	Proximal	neck	0.19	0.05	3.8
37	Proximal	neck	0.18	0.06	3
38	Proximal	neck	0.18	0.05	3.6
39	Proximal	neck	0.13	0.05	2.6
40	Proximal	neck	0.15	0.05	3
41	Proximal	neck	0.21	0.06	3.5
42	Proximal	neck	0.3	0.06	5
43	Proximal	neck	0.33	0.05	6.6
44	Proximal	neck	0.4	0.06	6.66667
45	Proximal	neck	0.21	0.04	5.25
46	Proximal	neck	0.11	0.04	2.75
47	Proximal	neck	0.21	0.04	5.25
48	Proximal	neck	0.15	0.04	3.75
49	Proximal	neck	0.21	0.05	4.2
50	Proximal	neck	0.2	0.03	6.66667
1	Mid	neck	0.18	0.06	3
2	Mid	neck	0.18	0.06	3
3	Mid	neck	0.14	0.07	2
4	Mid	neck	0.17	0.04	4.25
5	Mid	neck	0.17	0.06	2.83333
6	Mid	neck	0.15	0.09	1.66667
7	Mid	neck	0.17	0.06	2.83333
8	Mid	neck	0.12	0.06	2
9	Mid	neck	0.16	0.04	4
10	Mid	neck	0.18	0.07	2.57143
11	Mid	neck	0.25	0.05	5
12	Mid	neck	0.21	0.05	4.2
13	Mid	neck	0.12	0.06	2
14	Mid	neck	0.2	0.06	3.33333
15	Mid	neck	0.12	0.06	2
16	Mid	neck	0.27	0.08	3.375
17	Mid	neck	0.18	0.08	2.25
18	Mid	neck	0.17	0.05	3.4
19	Mid	neck	0.11	0.06	1.83333
20	Mid	neck	0.1	0.08	1.25
21	Mid	neck	0.24	0.05	4.8
22	Mid	neck	0.14	0.06	2.33333
23	Mid	neck	0.21	0.06	3.5
24	Mid	neck	0.17	0.06	2.83333
25	Mid	neck	0.21	0.05	4.2
26	Mid	neck	0.28	0.05	5.6
27	Mid	neck	0.15	0.07	2.14286
28	Mid	neck	0.16	0.06	2.66667
29	Mid	neck	0.18	0.04	4.5
30	Mid	neck	0.15	0.08	1.875
31	Mid	neck	0.23	0.03	7.66667
32	Mid	neck	0.16	0.06	2.66667
33	Mid	neck	0.25	0.07	3.57143
34	Mid	neck	0.22	0.05	4.4
35	Mid	neck	0.26	0.05	5.2
36	Mid	neck	0.15	0.05	3
37	Mid	neck	0.17	0.08	2.125
38	Mid	neck	0.15	0.05	3
39	Mid	neck	0.12	0.05	2.4
40	Mid	neck	0.17	0.06	2.83333
41	Mid	neck	0.19	0.07	2.71429
42	Mid	neck	0.2	0.07	2.85714
43	Mid	neck	0.17	0.06	2.83333
44	Mid	neck	0.24	0.07	3.42857
45	Mid	neck	0.22	0.06	3.66667
46	Mid	neck	0.21	0.07	3
47	Mid	neck	0.19	0.05	3.8
48	Mid	neck	0.15	0.07	2.14286
49	Mid	neck	0.18	0.07	2.57143
50	Mid	neck	0.22	0.05	4.4
1	Distal	neck	0.14	0.07	2
2	Distal	neck	0.15	0.08	1.875
3	Distal	neck	0.15	0.05	3
4	Distal	neck	0.15	0.07	2.14286
5	Distal	neck	0.12	0.07	1.71429
6	Distal	neck	0.15	0.07	2.14286
7	Distal	neck	0.11	0.07	1.57143
8	Distal	neck	0.14	0.08	1.75
9	Distal	neck	0.12	0.07	1.71429
10	Distal	neck	0.12	0.09	1.33333
11	Distal	neck	0.11	0.06	1.83333
12	Distal	neck	0.13	0.06	2.16667
13	Distal	neck	0.14	0.08	1.75
14	Distal	neck	0.18	0.07	2.57143
15	Distal	neck	0.11	0.07	1.57143
16	Distal	neck	0.1	0.08	1.25
17	Distal	neck	0.09	0.07	1.28571
18	Distal	neck	0.13	0.09	1.44444
19	Distal	neck	0.1	0.07	1.42857
20	Distal	neck	0.11	0.08	1.375
21	Distal	neck	0.21	0.07	3
22	Distal	neck	0.17	0.07	2.42857
23	Distal	neck	0.16	0.09	1.77778
24	Distal	neck	0.14	0.06	2.33333
25	Distal	neck	0.18	0.06	3
26	Distal	neck	0.15	0.07	2.14286
27	Distal	neck	0.15	0.05	3
28	Distal	neck	0.16	0.08	2
29	Distal	neck	0.17	0.06	2.83333
30	Distal	neck	0.13	0.06	2.16667
31	Distal	neck	0.16	0.07	2.28571
32	Distal	neck	0.17	0.06	2.83333
33	Distal	neck	0.13	0.07	1.85714
34	Distal	neck	0.16	0.06	2.66667
35	Distal	neck	0.15	0.06	2.5
36	Distal	neck	0.14	0.06	2.33333
37	Distal	neck	0.1	0.07	1.42857
38	Distal	neck	0.11	0.05	2.2
39	Distal	neck	0.13	0.06	2.16667
40	Distal	neck	0.13	0.07	1.85714
41	Distal	neck	0.14	0.07	2
42	Distal	neck	0.15	0.06	2.5
43	Distal	neck	0.13	0.07	1.85714
44	Distal	neck	0.13	0.06	2.16667
45	Distal	neck	0.16	0.07	2.28571
46	Distal	neck	0.15	0.06	2.5
47	Distal	neck	0.14	0.06	2.33333
48	Distal	neck	0.14	0.06	2.33333
49	Distal	neck	0.11	0.06	1.83333
50	Distal	neck	0.13	0.07	1.85714

## Sheet: Table 4
Gapping-Incubation 4 h
Type fruit	#sample		Control		Neck
treatment		mass (g)	W(mm)	mass (g)	W(mm)					Count		Frequency (%)
Latitudinal proximal	1	16.1847	0.82626	17.7433	0.891141			Crack direction	Zone	Normal	Neck	Normal	Neck
Latitudinal proximal	2	14.2882	1.06393	12.0186	1.13279			Latitudinal	Proximal	2	15	3.38983	25.4237
Latitudinal proximal	3	15.2332	0.732207	17.4929	0.877767			Latitudinal	mid	1	1	1.69492	1.69492
Latitudinal proximal	4	14.3077	0.632023	12.4156	0.759099			Latitudinal	Distal	2	2	3.38983	3.38983
Latitudinal proximal	5	13.7257	0.773181	12.1339	0.991387			Tangential	Body (receptacle)	1	2	1.69492	3.38983
Latitudinal proximal	6	11.7545	0.594755	11.0643	1.63714			Longitudinal	Distal	5	15	8.47458	25.4237
Latitudinal proximal	7	13.1025	0.646685	6.75204	1.07723			Longitudinal	Body (receptacle)	3	7	5.08475	11.8644
Latitudinal proximal	8	9.53814	0.492472	7.11651	0.618552			Other	Body (receptacle)	1	2	1.69492	3.38983
Latitudinal proximal	9	6.46292	0.38274	7.9592	0.479184			Total # cracks	59	15	44	25.4237	74.5763
Latitudinal proximal	10	6.9054	0.452366	8.29601	0.912542
Latitudinal mid	1	19.5509	1.69781	21.0471	0.991588
Latitudinal mid	2	17.6331	2.03292	13.1437	1.16557
Latitudinal mid	3	17.8054	0.698711	14.2618	1.50333
Latitudinal mid	4	16.1261	1.16794	13.1872	1.25684
Latitudinal mid	5	16.1699	1.50427	11.3748	1.0719
Latitudinal mid	6	8.54248	1.22936	8.83714	0.931532
Latitudinal mid	7	11.6033	0.673217	9.21091	1.50374
Latitudinal mid	8	9.54833	1.00408	11.517	1.75569
Latitudinal mid	9	10.9313	0.844573	10.9054	0.936267
Latitudinal mid	10	11.1174	1.01213	12.0022	1.03767
Latitudinal distal	1	17.139	0.960327	14.8142	0.979745
Latitudinal distal	2	13.3721	1.43361	17.1955	1.32998
Latitudinal distal	3	17.509	1.05072	13.2972	1.05803
Latitudinal distal	4	19.1346	0.96343	13.3862	0.605439
Latitudinal distal	5	17.5966	1.11048	11.4752	1.1108
Latitudinal distal	6	8.12405	1.00408	10.6666	1.8687
Latitudinal distal	7	10.4014	0.773667	7.76132	1.2133
Latitudinal distal	8	6.22034	0.819624	9.81521	0.846351
Latitudinal distal	9	7.13935	1.03869	6.56451	1.23082
Latitudinal distal	10	12.2353	0.478769	8.30567	1.38624
Latitudinal body (max diameter)	1	15.9229	0.778255	18.1453	1.17112
Latitudinal body (max diameter)	2	17.519	0.684937	13.5205	1.43466
Latitudinal body (max diameter)	3	14.7553	1.05166	11.015	1.00587
Latitudinal body (max diameter)	4	16.8011	1.17705	13.1024	1.03686
Latitudinal body (max diameter)	5	14.4859	0.798944	11.7482	1.00382
Latitudinal body (max diameter)	6	14.3257	0.706858	9.97233	1.31661
Latitudinal body (max diameter)	7	10.84	1.40273	7.63247	0.91817
Latitudinal body (max diameter)	8	11.2016	0.348896	8.26719	0.874613
Latitudinal body (max diameter)	9	6.39627	0.432426	11.2953	1.38977
Latitudinal body (max diameter)	10	7.47775	0.844521
Longitudinal distal	1	11.8306	1.49099	19.9369	1.66924
Longitudinal distal	2	16.3691	1.21825	18.7837	1.59612
Longitudinal distal	3	9.2992	1.95598	11.5218	1.27743
Longitudinal distal	4	15.394	0.631708	14.2035	1.66244
Longitudinal distal	5	17.006	0.726752	12.9219	1.69151
Longitudinal distal	6	12.5294	1.41144	9.11987	1.50317
Longitudinal distal	7	12.1495	0.798944	8.42822	1.51125
Longitudinal distal	8	9.06075	0.833188	11.5245	1.424
Longitudinal distal	9	7.47147	0.988372	7.94548	1.1191
Longitudinal distal	10	12.7823	0.662558	6.4314	1.24135
Longitudinal body (max diameter)	1	13.9322	1.09053	18.6134	1.08126
Longitudinal body (max diameter)	2	19.4043	1.04347	21.21	1.20429
Longitudinal body (max diameter)	3	13.9931	0.661657	14.8802	1.36963
Longitudinal body (max diameter)	4	13.2096	1.27007	12.5134	1.52393
Longitudinal body (max diameter)	5	17.6979	0.912178	14.9305	1.25014
Longitudinal body (max diameter)	6			9.23725	0.852027
Longitudinal body (max diameter)	7	10.0347	0.671902	8.21798	1.18153
Longitudinal body (max diameter)	8	11.1197	1.00428	8.97201	0.937966
Longitudinal body (max diameter)	9	10.2029	0.367896	11.2261	1.20429
Longitudinal body (max diameter)	10	7.0893	0.90522	7.69119	0.977486

## Sheet: S1
Gaping-assay - Incubation 4 h
Type fruit	#sample		Control		Neck
treatment		mass (g)	L(mm)	mass (g)	L(mm)
Latitudinal proximal	1	16.1847	5.7015	17.7433	5.74941
Latitudinal proximal	2	14.2882	4.97394	12.0186	5.73883
Latitudinal proximal	3	15.2332	5.2286	17.4929	5.06732
Latitudinal proximal	4	14.3077	5.02078	12.4156	5.45206
Latitudinal proximal	5	13.7257	5.13937	12.1339	5.53883
Latitudinal proximal	6	11.7545	5.33862	11.0643	5.59895
Latitudinal proximal	7	13.1025	5.43582	6.75204	5.62559
Latitudinal proximal	8	9.53814	5.03471	7.11651	5.63741
Latitudinal proximal	9	6.46292	5.58968	7.9592	5.0546
Latitudinal proximal	10	6.9054	5.62433	8.29601	5.23513
Latitudinal mid	1	19.5509	7.65101	21.0471	5.50033
Latitudinal mid	2	17.6331	6.39964	13.1437	5.859
Latitudinal mid	3	17.8054	5.62743	14.2618	7.32269
Latitudinal mid	4	16.1261	5.96218	13.1872	6.06061
Latitudinal mid	5	16.1699	6.76366	11.3748	5.45279
Latitudinal mid	6	8.54248	6.50153	8.83714	6.03793
Latitudinal mid	7	11.6033	5.25214	9.21091	6.63393
Latitudinal mid	8	9.54833	5.3065	11.517	6.63607
Latitudinal mid	9	10.9313	5.26974	10.9054	5.64587
Latitudinal mid	10	11.1174	5.23403	12.0022	5.64198
Latitudinal distal	1	17.139	5.49009	14.8142	7.09752
Latitudinal distal	2	13.3721	4.98991	17.1955	5.47789
Latitudinal distal	3	17.509	5.87495	13.2972	5.76349
Latitudinal distal	4	19.1346	6.54028	13.3862	5.49423
Latitudinal distal	5	17.5966	6.06939	11.4752	5.66827
Latitudinal distal	6	8.12405	6.16416	10.6666	5.61351
Latitudinal distal	7	10.4014	5.16134	7.76132	4.91236
Latitudinal distal	8	6.22034	5.78028	9.81521	5.49887
Latitudinal distal	9	7.13935	5.95591	6.56451	5.80174
Latitudinal distal	10	12.2353	5.37433	8.30567	6.54838
Latitudinal body (max diameter)	1	15.9229	5.46827	18.1453	6.06558
Latitudinal body (max diameter)	2	17.519	5.21354	13.5205	6.37865
Latitudinal body (max diameter)	3	14.7553	6.01879	11.015	5.46609
Latitudinal body (max diameter)	4	16.8011	6.38248	13.1024	5.1696
Latitudinal body (max diameter)	5	14.4859	4.90695	11.7482	5.0198
Latitudinal body (max diameter)	6	14.3257	5.48418	9.97233	5.40636
Latitudinal body (max diameter)	7	10.84	6.46116	7.63247	5.23508
Latitudinal body (max diameter)	8	11.2016	4.91436	8.26719	5.3986
Latitudinal body (max diameter)	9	6.39627	5.87875	11.2953	5.23341
Latitudinal body (max diameter)	10	7.47775	6.29251
Longitudinal distal	1	11.8306	6.91617	19.9369	6.65901
Longitudinal distal	2	16.3691	6.22571	18.7837	6.00003
Longitudinal distal	3	9.2992	7.216	11.5218	6.34876
Longitudinal distal	4	15.394	5.1145	14.2035	7.30617
Longitudinal distal	5	17.006	5.4529	12.9219	6.19841
Longitudinal distal	6	12.5294	5.15817	9.11987	4.95414
Longitudinal distal	7	12.1495	6.31661	8.42822	5.61918
Longitudinal distal	8	9.06075	5.44327	11.5245	7.01922
Longitudinal distal	9	7.47147	5.60121	7.94548	8.16697
Longitudinal distal	10	12.7823	5.28813	6.4314	7.06236
Longitudinal body (max diameter)	1	13.9322	4.91915	18.6134	5.97712
Longitudinal body (max diameter)	2	19.4043	5.59837	21.21	5.43835
Longitudinal body (max diameter)	3	13.9931	5.44581	14.8802	6.28664
Longitudinal body (max diameter)	4	13.2096	4.93375	12.5134	6.02106
Longitudinal body (max diameter)	5	17.6979	4.98097	14.9305	5.32664
Longitudinal body (max diameter)	6			9.23725	4.90025
Longitudinal body (max diameter)	7	10.0347	5.08075	8.21798	5.40754
Longitudinal body (max diameter)	8	11.1197	5.3479	8.97201	5.23353
Longitudinal body (max diameter)	9	10.2029	4.98497	11.2261	5.23753
Longitudinal body (max diameter)	10	7.0893	5.46037	7.69119	4.90962
